# Supplementary material for: Seasonal Variation of Health-Promoting Bioactives in Broccoli and Methyl-Jasmonate Pre-Harvest Treatments to Enhance Their Contents
Source: MDPI journal article supplement (doi:10.3390/foods9101371), 2020-09-26
Supplement: s1 [file s1]

**Table S1.** Temperature (°C), humidity (%), wind (km/h), rain (mm) and sunlight exposure (h/day) during the three growing seasons.

|                           | Temperature <sup>1</sup> |      |      | Humidity <sup>1</sup> |      |      | Wind <sup>1</sup> |      | Rain <sup>1</sup> |      | Sunlight Exposure <sup>1</sup> |
|---------------------------|--------------------------|------|------|-----------------------|------|------|-------------------|------|-------------------|------|--------------------------------|
|                           | Min                      | Max  | Mean | Min                   | Max  | Mean | Max               | Mean | Total             | Days | Hours/Day                      |
| <b>Spring</b>             | 9.1                      | 21.2 | 14.8 | 43.5                  | 86.8 | 67   | 39.8              | 2.6  | 361.2             | 51   | 13.75                          |
| <b>Autumn</b>             | 8.8                      | 21   | 13.9 | 47.5                  | 87.3 | 72   | 34.5              | 2.8  | 185               | 30   | 10.8                           |
| <b>Dosage-application</b> | 9                        | 23.9 | 16.3 | 31.5                  | 79.5 | 56.8 | 32.5              | 2.8  | 123.4             | 20   | 13.75                          |

The accumulated weather variables were calculated based on the number of days from sowing to harvest.

**Table S2.** Pearson's correlation factor for the relationship between the chlorophyll content and the colour parameters (L\*, a\*, b\*, C\* and h\*) and the total carotenoids content in the three assays.

|                           | Assay           | L*    | a*       | b*        | C*        | h*        | Total Carotenoids |
|---------------------------|-----------------|-------|----------|-----------|-----------|-----------|-------------------|
| <b>Total chlorophylls</b> | <b>Spring *</b> | -0.04 | -0.01    | -0.31     | 0.34      | 0.14      | 0.52              |
| <b>Total chlorophylls</b> | <b>Autumn *</b> | -0.36 | 0.56 (*) | -0.58 (*) | -0.57 (*) | 0.67 (**) | 0.81 (**)         |
| <b>Total chlorophylls</b> | <b>Dosage</b>   | 0.04  | -0.04    | -0.27     | -0.25     | 0.16      | -0.35             |

The correlation is significant at p-value<0.05 (\*) or at p-value<0.01(\*\*).

**Table S3.** Tentative identification of individual carotenoids of broccoli florets analysed by HPLC-DAD.

| Retention Time (min) | $\lambda_{\max}$ (nm) | Tentative Identification | Method of Identification <sup>1</sup> |
|----------------------|-----------------------|--------------------------|---------------------------------------|
| 5.3                  | 414, 438, 468         | Neoxanthin               | B, C                                  |
| 6.4                  | 416, 438, 466         | Violaxanthin             | B, C                                  |
| 9.5                  | 418, 442, 472         | Lutein                   | A, B, C                               |
| 31.8                 | 430, 450, 476         | $\beta$ -carotene        | A, B, C                               |

<sup>1</sup>Method of tentative identification: (A) by comparison with the retentions times and wavelengths of maximum absorption in the UV/Vis spectra of authentic standards; (B) by spectral interpretation of the wavelengths of maximum absorption in the UV/Vis spectra and by comparison with the wavelengths of maximum absorption in the UV/Vis spectra reported by the bibliography [51–53]; (C) by comparison the order of chromatographic elution reported by the bibliography [52, 53].
